# Supplementary material for: Covalent Triazine Framework C6N6 as an Electrochemical Sensor for Hydrogen-Containing Industrial Pollutants. A DFT Study
Source: MDPI journal article supplement (doi:10.3390/nano13061121), 2023-03-21
Supplement: s1 [file s1]

Supporting Information

# Covalent Triazine Framework C<sub>6</sub>N<sub>6</sub> as an Electrochemical Sensor for Hydrogen-Containing Industrial Pollutants. A DFT Study

Hassan H. Hammud <sup>1,\*</sup>, Muhammad Yar <sup>2,†</sup>, Imene Bayach <sup>1</sup> and Khurshid Ayub <sup>2,\*</sup>

<sup>1</sup> Department of Chemistry, College of Science, King Faisal University, Al-Ahsa 31982, Saudi Arabia

<sup>2</sup> Department of Chemistry, COMSATS University Islamabad, Abbottabad Campus, KPK, Islamabad 22060, Pakistan

\* Correspondence: hhammoud@kfu.edu.sa (H.H.H.); khurshid@cuiatd.edu.pk (K.A.)

† These authors contributed equally.

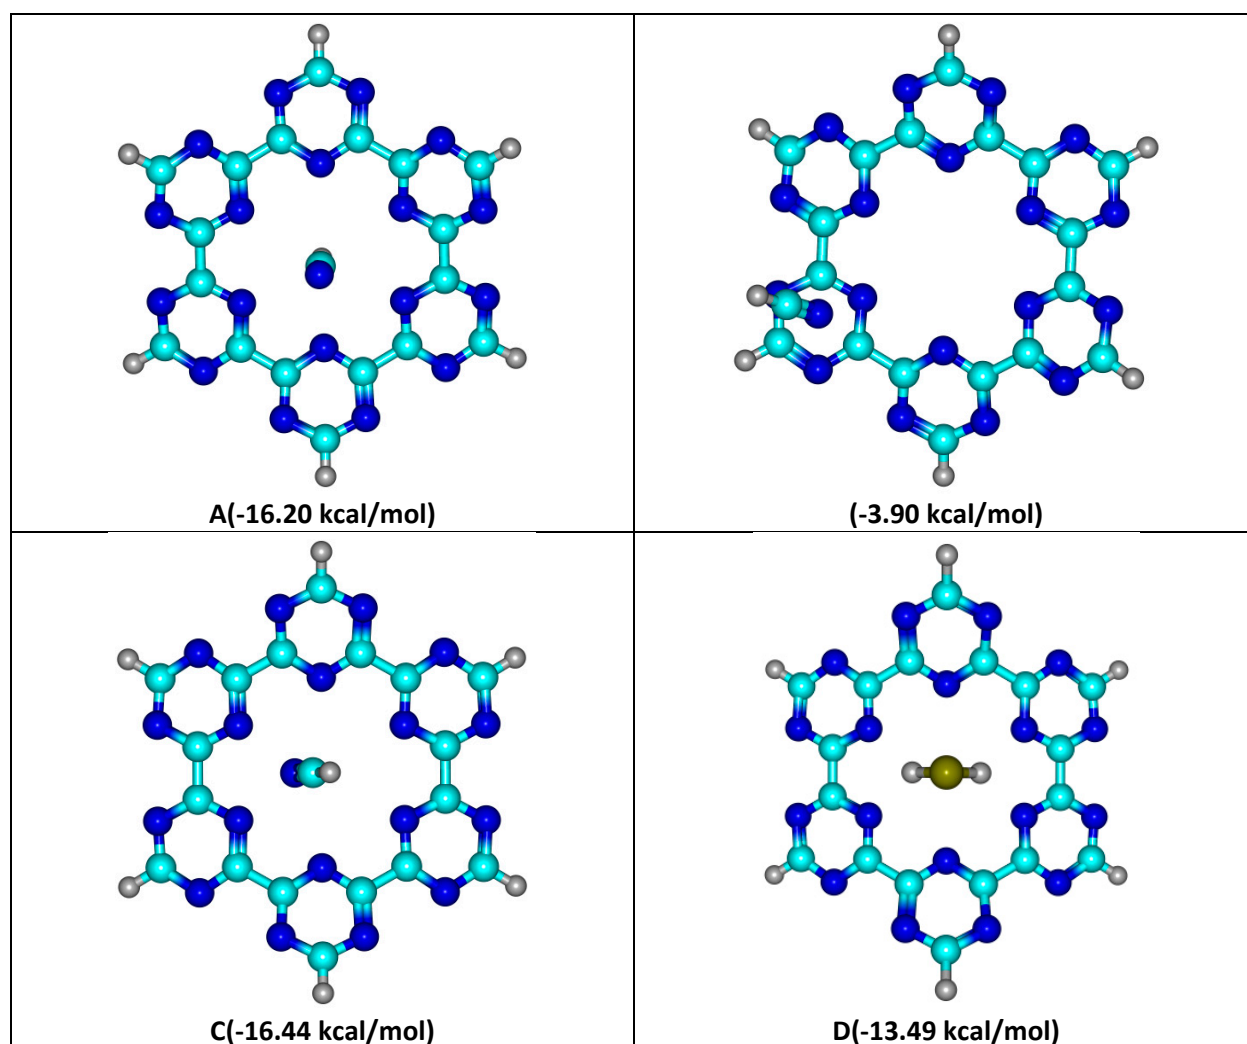

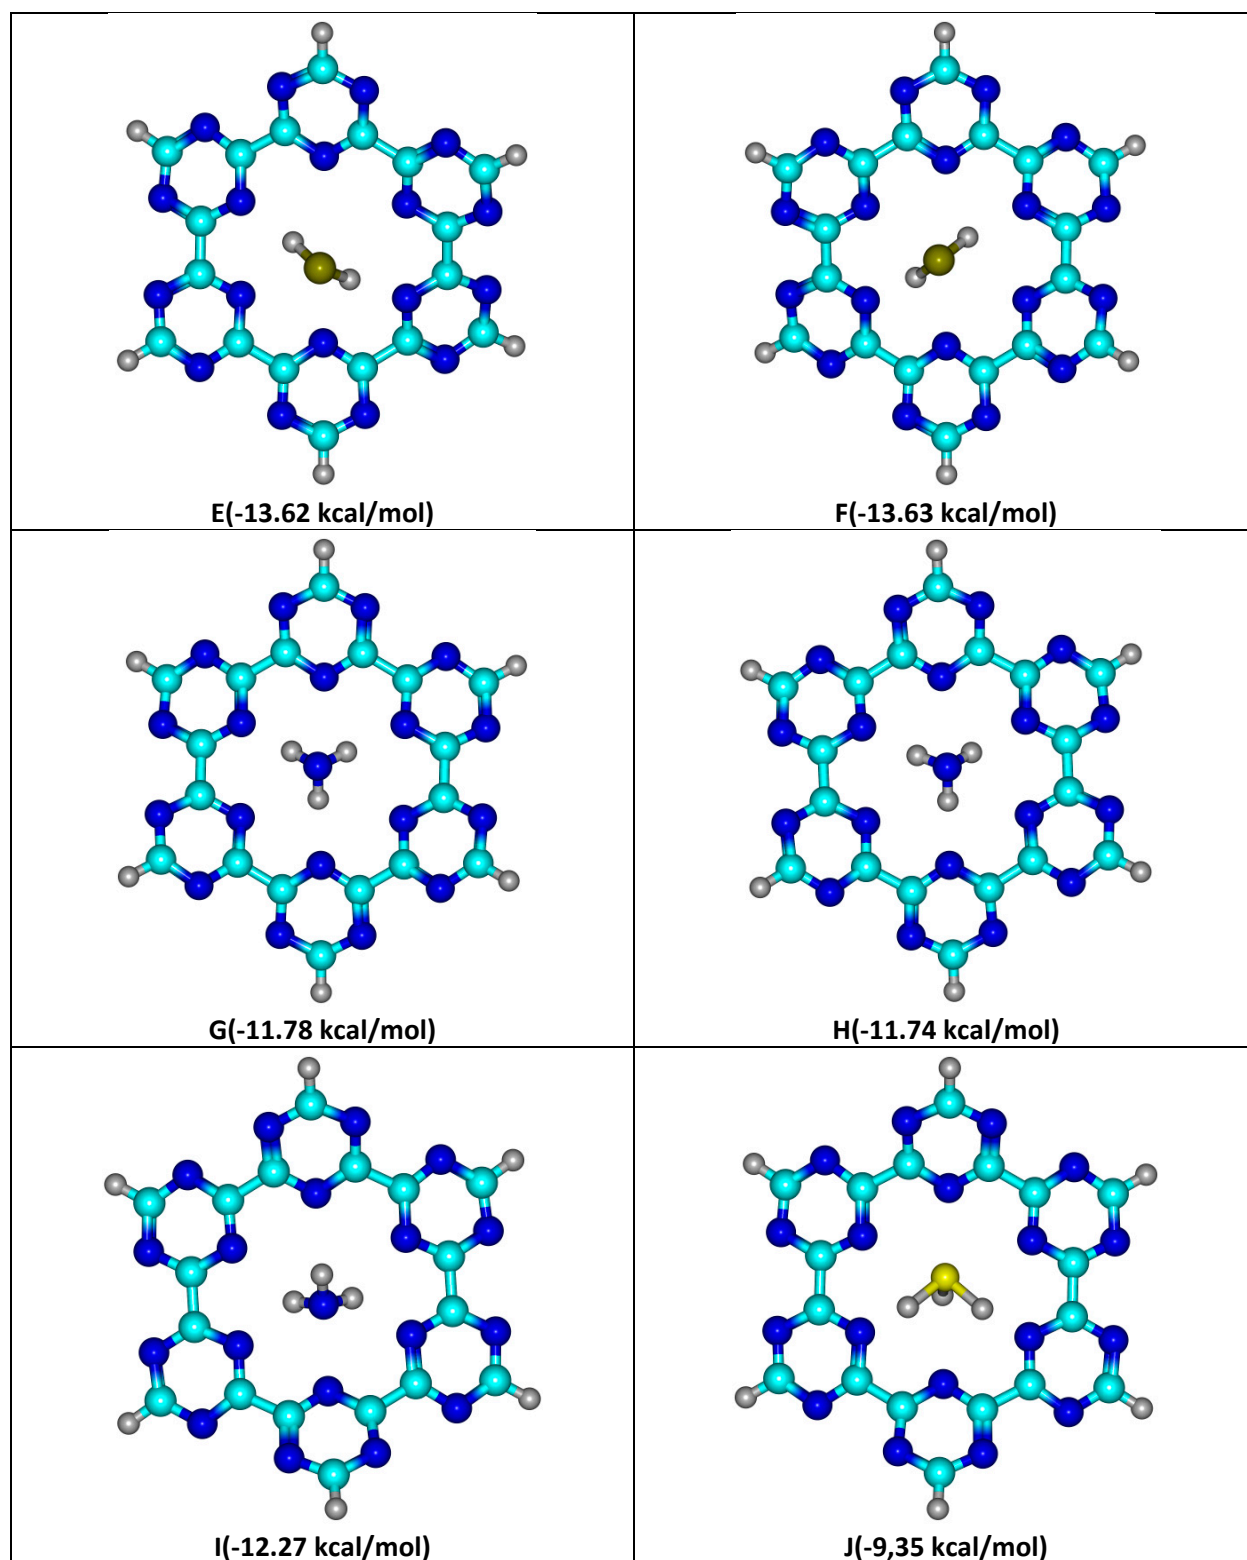

**Figure S1.** Optimized geometries of least stable complexes of each analyte over C<sub>6</sub>N<sub>6</sub> at  $\omega$ b97XD/6-31G (d,p) level of theory.(HCN/C<sub>6</sub>N<sub>6</sub> complexes (A-C), H<sub>2</sub>S/C<sub>6</sub>N<sub>6</sub> complexes (D-F), NH<sub>3</sub>/C<sub>6</sub>N<sub>6</sub> complexes (G-I), PH<sub>3</sub>/C<sub>6</sub>N<sub>6</sub> complexes (J)).
